# Supplementary material for: Coated electrodes for liquid thermoelectric conversion devices to enhance Fe2+/Fe3+ redox kinetics
Source: Royal Society of Chemistry journal article supplement (doi:10.1039/d4se00220b), 2024-01-01
Supplement: d4se00220b1.pdf [file d4se00220b1.pdf]

### Electronic Supplementary Information

Coated electrode for liquid thermoelectric conversion device to enhance  $\text{Fe}^{2+}/\text{Fe}^{3+}$  redox kinetics

Touya Aiba<sup>1</sup>, Dai Inoue<sup>1</sup>, and Yutaka Moritomo<sup>1,2,3</sup>

<sup>1</sup> Graduate School of Pure & Applied Science, University of Tsukuba, Tsukuba, Ibaraki 305-7571, Japan

<sup>2</sup> Faculty of Pure & Applied Science, University of Tsukuba, Tsukuba, Ibaraki 305-7571, Japan

<sup>3</sup> Tsukuba Research Center for Energy Materials Science (TREMS), University of Tsukuba, Ibaraki 305-8571, Japan

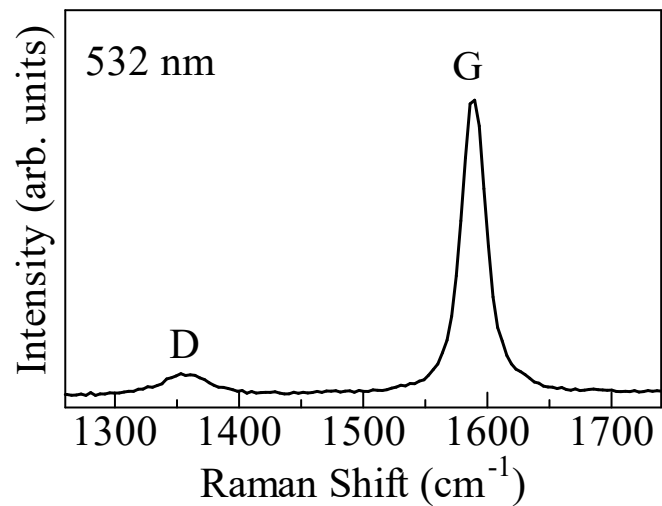

Fig. S1 Raman spectra of graphite powder at room temperature. D and G represent for disorder and graphite bands, respectively. Excitation wavelength was 532 nm.

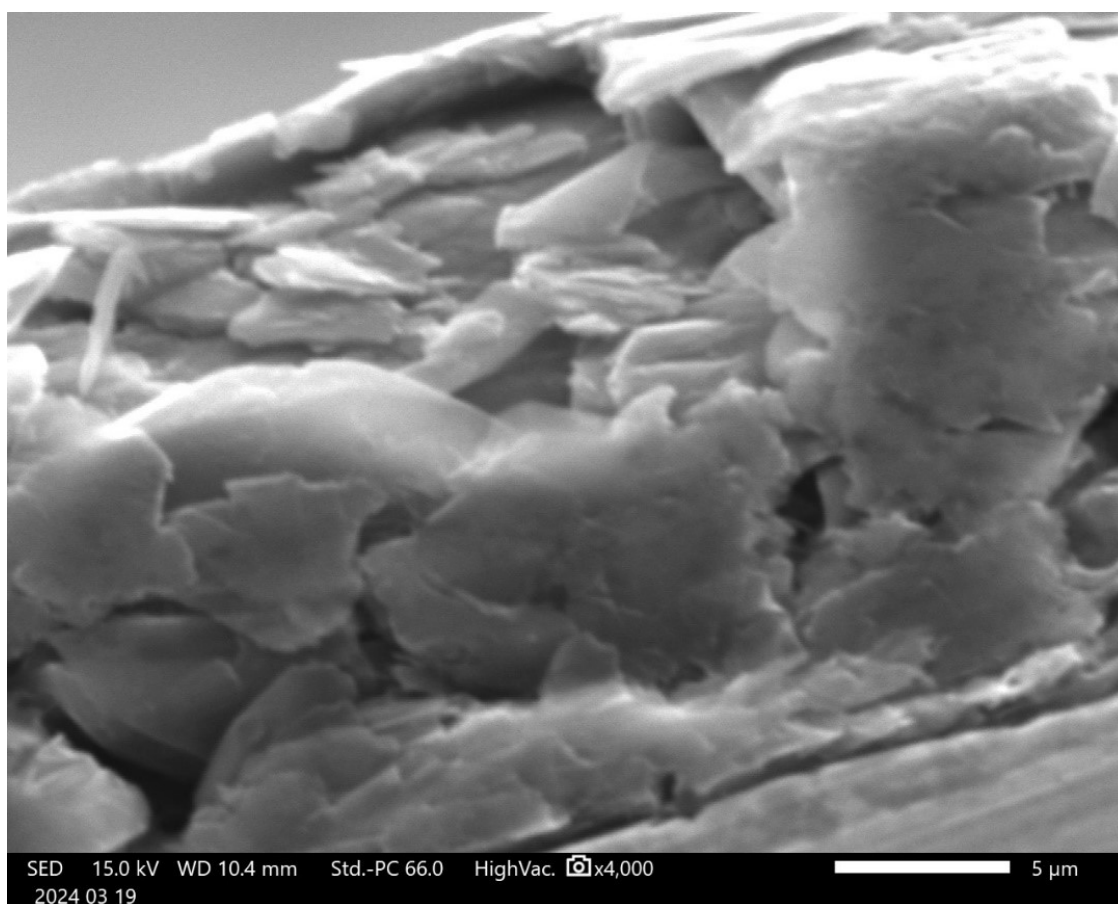

Fig. S2 Magnified cross sectional SEM image of graphite-dispersing coated electrode ( $t = 25 \mu\text{m}$ ).

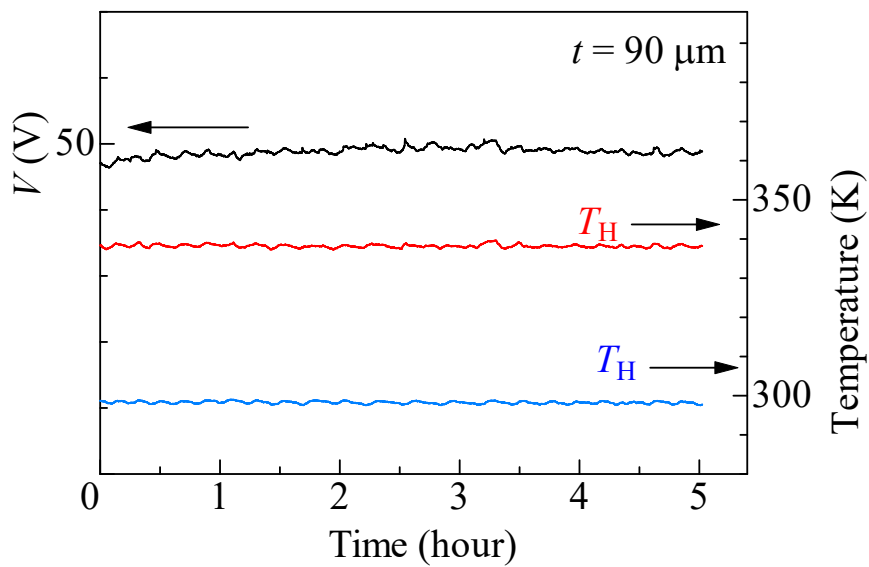

Fig. S3 Thermal voltage  $V$  and temperature ( $T_H$  and  $T_L$ ) of electrodes of LTE composed of graphite-dispersing coated electrodes against time. Electrode distance  $d$  was 10 mm and electrode thickness  $t$  was  $90 \mu\text{m}$ . The electrolyte is  $0.8 \text{ M Fe}(\text{ClO}_4)_2/\text{Fe}(\text{ClO}_4)_3$  aqueous solution.
